# Supplementary material for: Practical, environment-benign and atom economic KOAc-catalysed deprotection of aryl TIPS ethers under mild fluoride-free conditions
Source: Royal Society of Chemistry journal article supplement (doi:10.1039/b905443j), 2009-01-01

Supporting Information for:

**Practical, environment-benign and atom economic KOAc-catalysed deprotection of aryl  
TIPS ethers under mild fluoride-free conditions.**

Bing Wang,\* Hui-Xia Sun, Bo Chen, Zhi-Hua Sun\*

*Department of Chemistry, Fudan University, 220 Handan Road, Shanghai 200433, China, Institutes of  
Biomedical Sciences, Fudan University, 138 Yixueyuan Road, Shanghai 200032, China, and Shanghai Saijia  
Chemicals Co., Ltd., Suite 402, No. 54, Lane 33, Shilong Road, Shanghai 200232, China.*

*wangbing@fudan.edu.cn.*

Table of Contents

|                                                                     |             |
|---------------------------------------------------------------------|-------------|
| 1. General Information.                                             | .....S2     |
| 2. Procedure for large-scale reaction.                              | .....S2     |
| 3. Characterization data of new compounds.                          | .....S2-S4  |
| 4. <sup>1</sup> H and <sup>13</sup> C NMR spectra of new compounds. | .....S5-S18 |

**General Information.** All  $^1\text{H}$  NMR spectra were recorded at ambient temperature in  $\text{CDCl}_3$  (500 MHz) unless otherwise stated. All  $^{13}\text{C}$  NMR spectra were recorded at ambient temperature in  $\text{CDCl}_3$  (125 MHz). Chemical shifts are reported in parts per million as follows: chemical shift, multiplicity (s = singlet, d = doublet, t = triplet, q = quartet, m = multiplet, br = broad), integration, and coupling constant. Melting points were uncorrected.

**Procedure for large-scale reaction without chromatography (unoptimized):**

To a solution of ethyl 4-(triisopropylsilyloxy)benzoate (15.3 g, 47.5 mmol) in DMF– $\text{H}_2\text{O}$  (20:1, 50 mL) was added KOAc (466 mg, 4.8 mmol) and water (0.9 mL, 1 equiv to substrate), and stirring was continued for 7 h at 25 °C. The mixture was concentrated on a rotavap (bath temp 50 °C) to remove DMF (~90% recovery). The remaining oil was bulb-to-bulb distilled (bath temp 75 °C/1–2 mmHg) to recover TIPSOH (6.5 g, 79% yield), the cooled residue was taken up in EtOAc– $\text{Et}_2\text{O}$  (1:1, 30 mL) and filtered to remove KOAc (reusable); the filtrate was concentrated. The crude product was triturated with hexane to afford ethyl 4-hydroxybenzoate (7.0 g, 89%) as white crystals (m.p.: 113–118 °C, lit. 115–118 °C). The recovered KOAc gave negative results for  $\text{FeCl}_3$ -test of phenols.

Optimal purification procedure for an individual product should take into consideration of the physical property and stability of the compound concerned. The above procedure is a proof-of-concept and does not recommend recovering the cheap catalyst.

**Characterization data of new compounds.**

**Compound 1c:**

$^1\text{H}$  NMR ( $\text{CDCl}_3$ )  $\delta$  6.70 (d, 2H,  $J$  = 8.5 Hz), 6.56 (d, 2H,  $J$  = 8.5 Hz), 3.39 (s br, 2H), 1.20 (septet, 3H,  $J$  = 7.0 Hz), 1.08 (d, 18H,  $J$  = 7.0 Hz).

$^{13}\text{C}$  NMR ( $\text{CDCl}_3$ )  $\delta$  148.7, 140.0, 120.4, 116.3, 17.9, 12.6.

HR-ESI-MS  $m/z$  Calcd for  $\text{C}_{15}\text{H}_{28}\text{NOSi}$  ( $\text{M} + \text{H}^+$ ) 266.1940, Found 266.1935.

**Compound 1d:**

M.p.: 54.5–55.0 °C.

$^1\text{H}$  NMR ( $\text{CDCl}_3$ )  $\delta$  7.18 (d br, 2H,  $J$  = 8.5 Hz), 6.80 (d, 2H,  $J$  = 8.5 Hz), 6.32 (s br, 1H), 1.50 (s, 9H), 1.22 (septet, 3H,  $J$  = 7.0 Hz), 1.08 (d, 18H,  $J$  = 7.0 Hz).

$^{13}\text{C}$  NMR ( $\text{CDCl}_3$ )  $\delta$  153.1, 151.9, 131.6, 120.0 (2C), 80.1, 28.4, 17.9, 12.6

HR-ESI-MS  $m/z$  Calcd for  $\text{C}_{20}\text{H}_{36}\text{NO}_3\text{Si}$  ( $\text{M} + \text{H}^+$ ) 366.2464, Found 366.2438.

**Compound 1e:**

$^1\text{H}$  NMR ( $\text{CDCl}_3$ )  $\delta$  6.74 (s, 2H), 2.21 (s, 6H), 2.20 (s, 3H), 1.30 (septet, 3H,  $J$  = 8.0 Hz), 1.11 (d, 18H,  $J$  = 8.0 Hz).

$^{13}\text{C}$  NMR ( $\text{CDCl}_3$ )  $\delta$  151.1, 129.9, 129.3, 127.6, 20.4, 18.1, 17.8, 14.2.

HR-ESI-MS  $m/z$  Calcd for  $\text{C}_{18}\text{H}_{33}\text{OSi}$  ( $\text{M} + \text{H}^+$ ) 293.2301, Found 293.2335.

**Compound 1h:**

$^1\text{H}$  NMR ( $\text{CDCl}_3$ , 300 MHz)  $\delta$  7.80–7.76 (m, 1H), 7.46–7.39 (m, 1H), 7.05–6.95 (m, 2H), 1.34

(septet, 3H,  $J = 7.5$  Hz), 1.12 (d, 18H,  $J = 7.2$  Hz).

$^{13}\text{C}$  NMR ( $\text{CDCl}_3$ )  $\delta$  149.5, 133.5, 125.4, 121.4, 120.5, 17.8, 12.9.

HR-ESI-MS  $m/z$  Calcd for  $\text{C}_{15}\text{H}_{26}\text{NO}_3\text{Si}$  ( $\text{M} + \text{H}^+$ ) 296.1682, Found 296.1672.

Compound **1o**:

$^1\text{H}$  NMR ( $\text{CDCl}_3$ )  $\delta$  7.58 (d, 1H,  $J = 5.6$  Hz), 6.30 (d, 1H,  $J = 5.5$  Hz), 2.34 (s, 3H), 1.36 (septet, 3H,  $J = 7.5$  Hz), 1.07 (d, 18H,  $J = 7.5$  Hz).

$^{13}\text{C}$  NMR ( $\text{CDCl}_3$ )  $\delta$  173.8, 153.9, 152.6, 143.4, 115.4, 18.2, 14.8, 14.2.

HR-ESI-MS  $m/z$  Calcd for  $\text{C}_{15}\text{H}_{27}\text{O}_3\text{Si}$  ( $\text{M} + \text{H}^+$ ) 283.1729, Found 283.1732.

Compound **1p**:

$^1\text{H}$  NMR ( $\text{CDCl}_3$ , 300 MHz)  $\delta$  7.16 (d, 2H,  $J = 8.1$  Hz), 6.84 (d, 2H,  $J = 8.4$  Hz), 4.67 (s, 2H), 1.24 (septet, 3H,  $J = 7.5$  Hz), 1.10 (d, 18H,  $J = 6.9$  Hz), 0.92 (s, 9H), 0.08 (s, 6H).

$^{13}\text{C}$  NMR ( $\text{CDCl}_3$ )  $\delta$  155.0, 133.8, 127.4, 119.6, 64.8, 26.0, 18.4, 17.9, 12.7, -5.2.

HR-ESI-MS  $m/z$  Calcd for  $\text{C}_{22}\text{H}_{42}\text{O}_2\text{Si}_2\text{Na}$  ( $\text{M} + \text{Na}^+$ ) 417.2621, Found 417.2656.

Compound **1q**:

$^1\text{H}$  NMR ( $\text{CDCl}_3$ )  $\delta$  7.23 (d, 2H,  $J = 8.6$  Hz), 6.81 (d, 2H,  $J = 8.6$  Hz), 6.50 (d, 1H,  $J = 15.8$  Hz), 6.13 (dt, 1H,  $J = 15.8, 5.4$  Hz), 4.32 (d, 2H,  $J = 5.4$  Hz), 1.25 (septet, 3H,  $J = 7.0$  Hz), 1.09 (d, 18H,  $J = 7.0$  Hz), 0.93 (s, 9H), 0.10 (s, 6H).

$^{13}\text{C}$  NMR ( $\text{CDCl}_3$ )  $\delta$  155.6, 130.2, 129.3, 127.5, 126.9, 119.9, 64.1, 26.0, 18.5, 17.9, 12.7, -5.1.

HR-ESI-MS  $m/z$  Calcd for  $\text{C}_{24}\text{H}_{45}\text{O}_2\text{Si}_2$  ( $\text{M} + \text{H}^+$ ) 421.2958, Found 421.2945.

Compound **1r**:

$^1\text{H}$  NMR ( $\text{CDCl}_3$ )  $\delta$  7.71 (m, 4H), 7.41 (m, 2H), 7.35 (m, 4H), 6.96 (t, 1H,  $J = 8.2$  Hz), 6.47 (ddd, 1H,  $J = 8.0, 2.0, 1.0$  Hz), 6.41 (ddd, 1H,  $J = 8.0, 2.5, 1.0$  Hz), 6.20 (t, 1H,  $J = 2.5$  Hz), 1.08 (s, 9H), 0.94–0.88 (m, 21H).

$^{13}\text{C}$  NMR ( $\text{CDCl}_3$ )  $\delta$  156.7, 156.5, 135.5, 133.0, 129.8, 129.4, 127.7, 113.2, 112.8, 111.5, 26.5, 19.4, 17.8, 12.4.

Compound **1t**:

$^1\text{H}$  NMR ( $\text{CDCl}_3$ , 300 MHz)  $\delta$  7.21 (t, 1H,  $J = 7.5$  Hz), 6.95–6.80 (m, 3H), 5.05 (s, 2H), 2.11 (s, 3H), 1.26 (septet, 3H,  $J = 7.2$  Hz), 1.10 (d, 18H,  $J = 7.2$  Hz).

$^{13}\text{C}$  NMR ( $\text{CDCl}_3$ )  $\delta$  170.7, 156.2, 137.3, 129.4, 120.6, 119.5, 66.0, 20.9, 17.8, 12.6.

HR-ESI-MS  $m/z$  Calcd for  $\text{C}_{18}\text{H}_{30}\text{O}_3\text{SiNa}$  ( $\text{M} + \text{Na}^+$ ) 345.1862, Found 345.1876.

Compound **1u**:

$^1\text{H}$  NMR ( $\text{CDCl}_3$ , 300 MHz)  $\delta$  7.18 (t, 1H,  $J = 8.1$  Hz), 6.95–6.87 (m, 2H), 6.80 (m, 1H), 4.76–4.46 (AB, 2H,  $J_{\text{AB}} = 12.3$  Hz), 4.69 (t-like, 1H,  $J = 3.3$  Hz), 3.92 (m, 1H), 3.54 (m, 1H), 1.95–1.40 (m, 6H), 1.24 (septet, 3H,  $J = 7.2$  Hz), 1.10 (d, 18H,  $J = 6.9$  Hz).

$^{13}\text{C}$  NMR ( $\text{CDCl}_3$ )  $\delta$  156.1, 139.9, 129.2, 120.2, 119.1, 118.9, 97.5, 68.4, 62.1, 30.6, 25.5, 19.3, 17.9, 12.7.

HR-ESI-MS  $m/z$  Calcd for  $\text{C}_{21}\text{H}_{36}\text{O}_3\text{SiNa}$  ( $\text{M} + \text{Na}^+$ ) 387.2331, Found 387.2346.

Compound **1v**:

$^1\text{H}$  NMR ( $\text{CDCl}_3$ )  $\delta$  7.22 (t, 1H,  $J = 7.8$  Hz), 7.04 (d, 1H,  $J = 7.6$  Hz), 6.99 (m, 1H), 6.87 (m, 1H), 5.78 (s, 1H), 4.12–4.06 (m, 2H), 4.05–3.98 (m, 2H), 1.26 (septet, 3H,  $J = 7.0$  Hz), 1.09 (d, 18H,  $J = 7.0$  Hz).

$^{13}\text{C}$  NMR ( $\text{CDCl}_3$ )  $\delta$  156.0, 139.5, 129.3, 120.4, 118.9, 117.9, 103.5, 65.2, 17.9, 12.7.

HR-ESI-MS  $m/z$  Calcd for  $\text{C}_{18}\text{H}_{31}\text{O}_3\text{Si}$  ( $\text{M} + \text{H}^+$ ) 323.2042, Found 323.2063.

Compound **1w**:

$^1\text{H}$  NMR ( $\text{CDCl}_3$ )  $\delta$  7.10 (t, 1H,  $J = 8.2$  Hz), 6.51 (dd, 2H,  $J = 8.5, 2.2$  Hz), 6.47 (m, 1H), 4.16 (dd, 1H,  $J = 10.9, 3.3$  Hz), 3.93 (dd, 1H,  $J = 10.9, 5.6$  Hz), 3.34 (m, 1H), 2.90 (dd, 1H,  $J = 5.0, 4.3$  Hz), 2.75 (dd, 1H,  $J = 5.0, 2.7$  Hz), 1.26 (septet, 3H,  $J = 7.3$  Hz), 1.10 (d, 18H,  $J = 7.3$  Hz).

$^{13}\text{C}$  NMR ( $\text{CDCl}_3$ )  $\delta$  159.6, 157.2, 129.7, 113.0, 107.1, 106.9, 68.7, 50.0, 44.8, 17.9, 12.6.

HR-ESI-MS  $m/z$  Calcd for  $\text{C}_{18}\text{H}_{31}\text{O}_3\text{Si}$  ( $\text{M} + \text{H}^+$ ) 323.2042, Found 323.2032.

Compound **1x**:

$^1\text{H}$  NMR ( $\text{CDCl}_3$ , 300 MHz)  $\delta$  7.01 (d, 2H,  $J = 8.7$  Hz), 6.79 (d, 2H,  $J = 8.4$  Hz), 3.61 (quintet, 1H,  $J = 5.7$  Hz), 2.69–2.46 (m, 2H), 1.80–1.62 (m, 2H), 1.57–1.45 (m, 2H), 1.22 (septet, 3H,  $J = 6.9$  Hz), 1.08 (d, 18H,  $J = 7.2$  Hz), 0.96 (t, 9H,  $J = 7.5$  Hz), 0.88 (t, 3H,  $J = 7.2$  Hz), 0.60 (q, 6H,  $J = 7.8$  Hz).

$^{13}\text{C}$  NMR ( $\text{CDCl}_3$ )  $\delta$  153.9, 135.0, 129.0, 119.6, 73.1, 38.6, 31.0, 29.8, 17.9, 12.7, 9.6, 7.0, 5.1.

HR-ESI-MS  $m/z$  Calcd for  $\text{C}_{26}\text{H}_{51}\text{O}_2\text{Si}_2$  ( $\text{M} + \text{H}^+$ ) 451.3428, Found 451.3461.

Compound **2x**:

$^1\text{H}$  NMR ( $\text{CDCl}_3$ )  $\delta$  7.04 (d, 2H,  $J = 8.4$  Hz), 6.75 (d, 2H,  $J = 8.4$  Hz), 4.75 (s br, 1H), 3.64 (quintet, 1H,  $J = 5.8$  Hz), 2.63 (ddd, 1H,  $J = 14.0, 10.0, 6.0$  Hz), 2.52 (ddd, 1H,  $J = 14.0, 10.5, 6.0$  Hz), 1.77–1.64 (m, 2H), 1.56–1.45 (m, 2H), 0.97 (t, 9H,  $J = 8.0$  Hz), 0.89 (t, 3H,  $J = 7.5$  Hz), 0.61 (q, 6H,  $J = 8.0$  Hz).

$^{13}\text{C}$  NMR ( $\text{CDCl}_3$ )  $\delta$  153.6, 134.7, 129.3, 115.2, 73.3, 38.7, 30.9, 29.8, 9.7, 6.9, 5.1.

HR-ESI-MS  $m/z$  Calcd for  $\text{C}_{17}\text{H}_{29}\text{O}_2\text{Si}$  ( $\text{M} - \text{H}^+$ , negative ion) 293.1937, Found 293.1899.

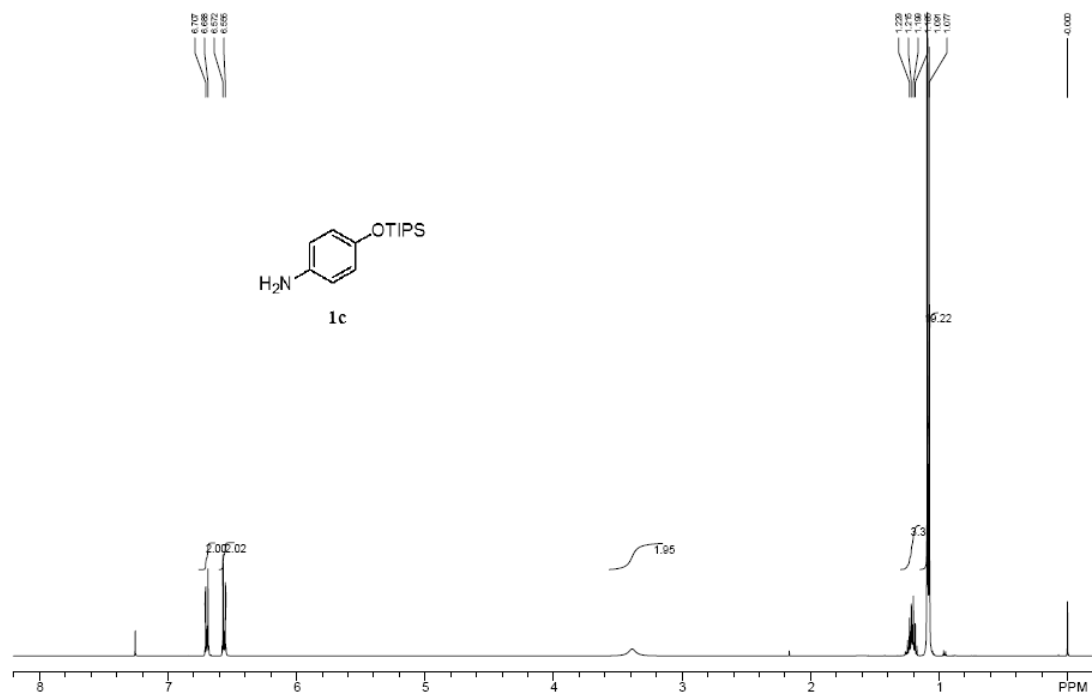

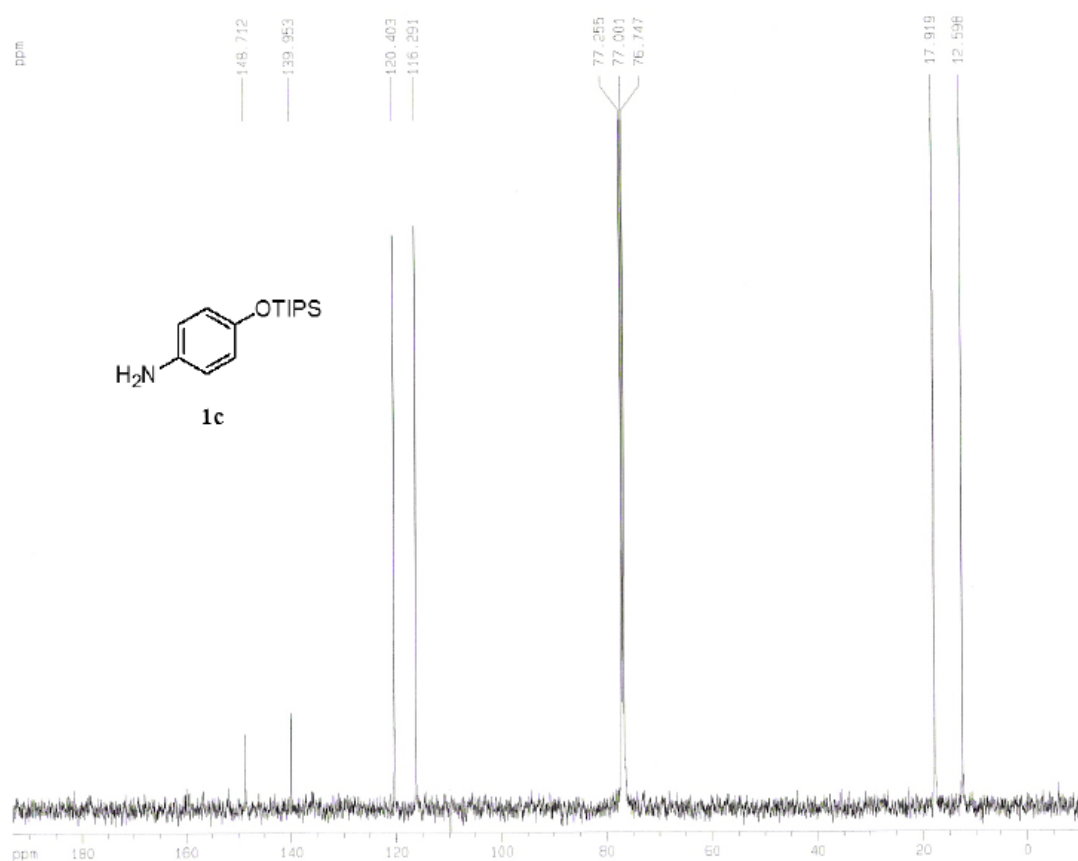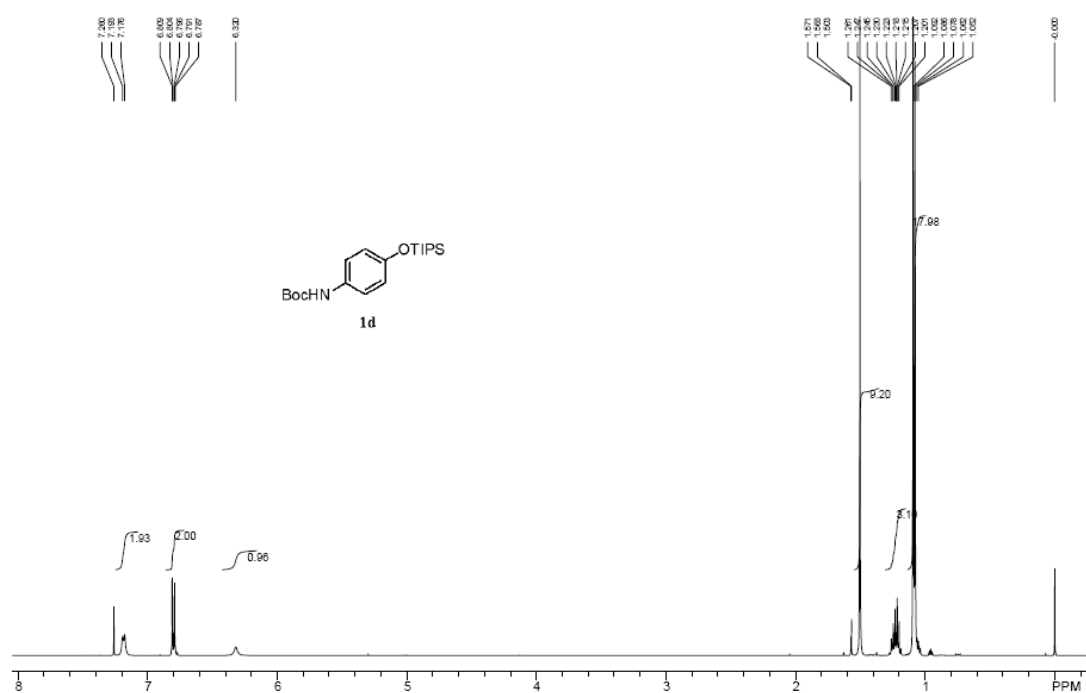

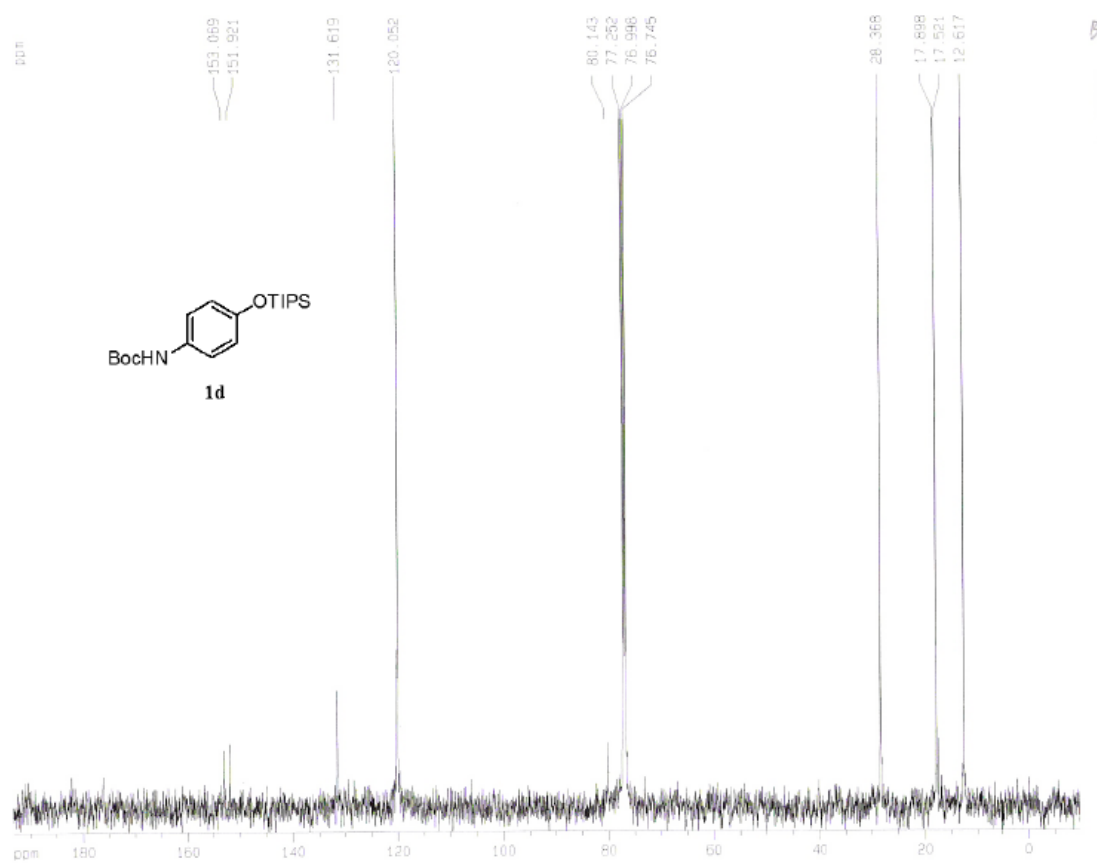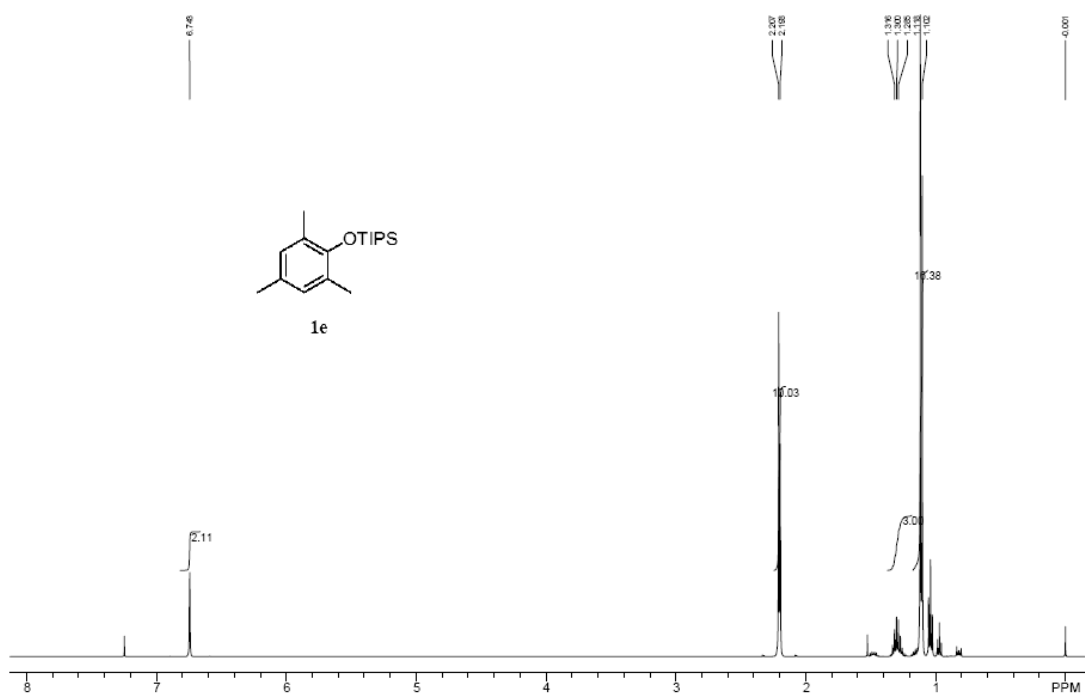

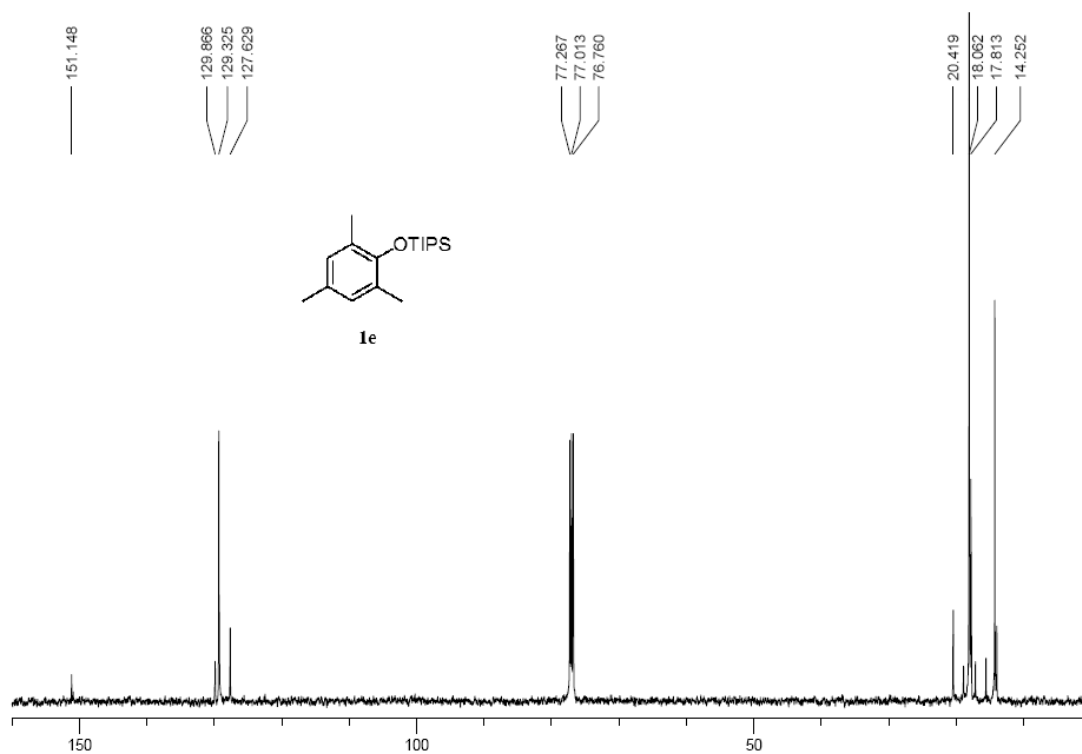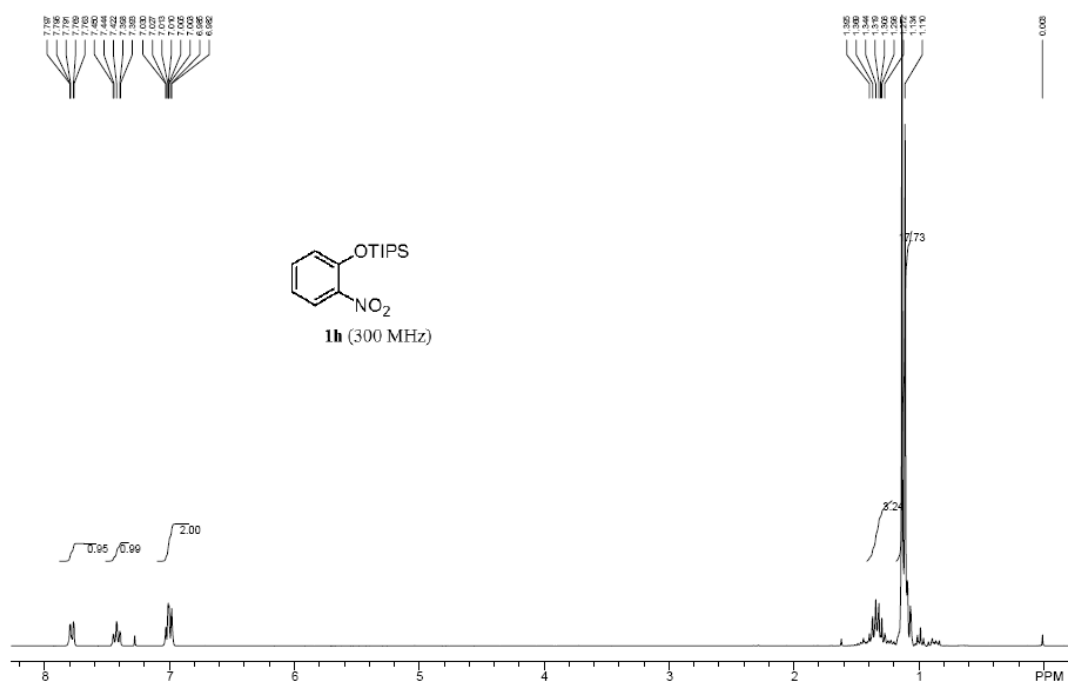



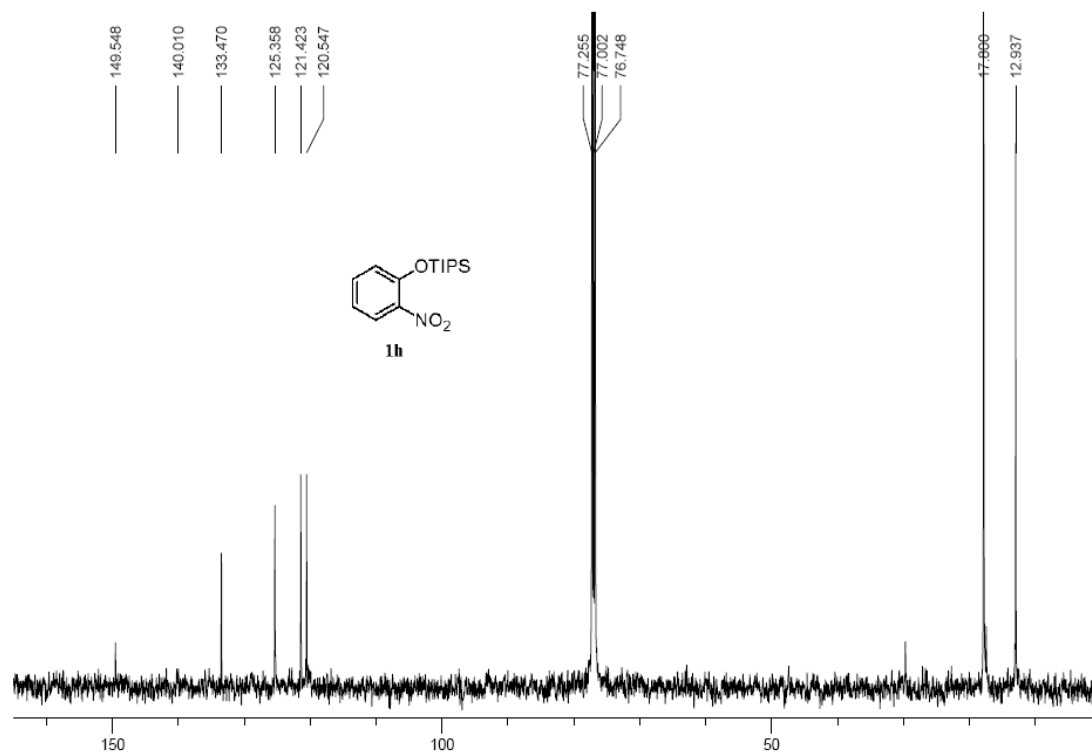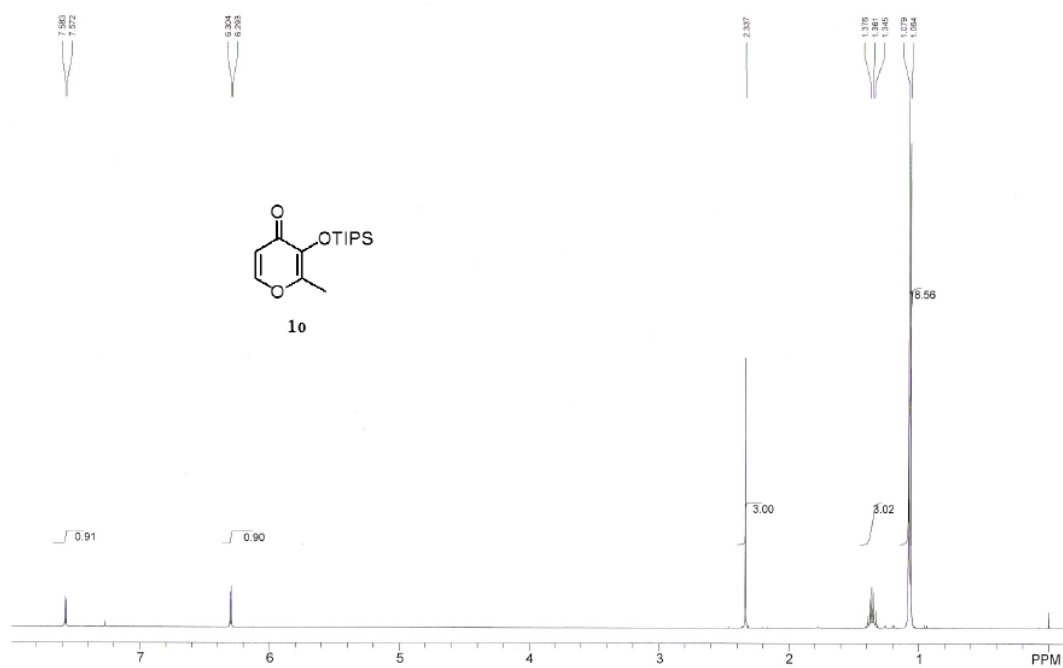

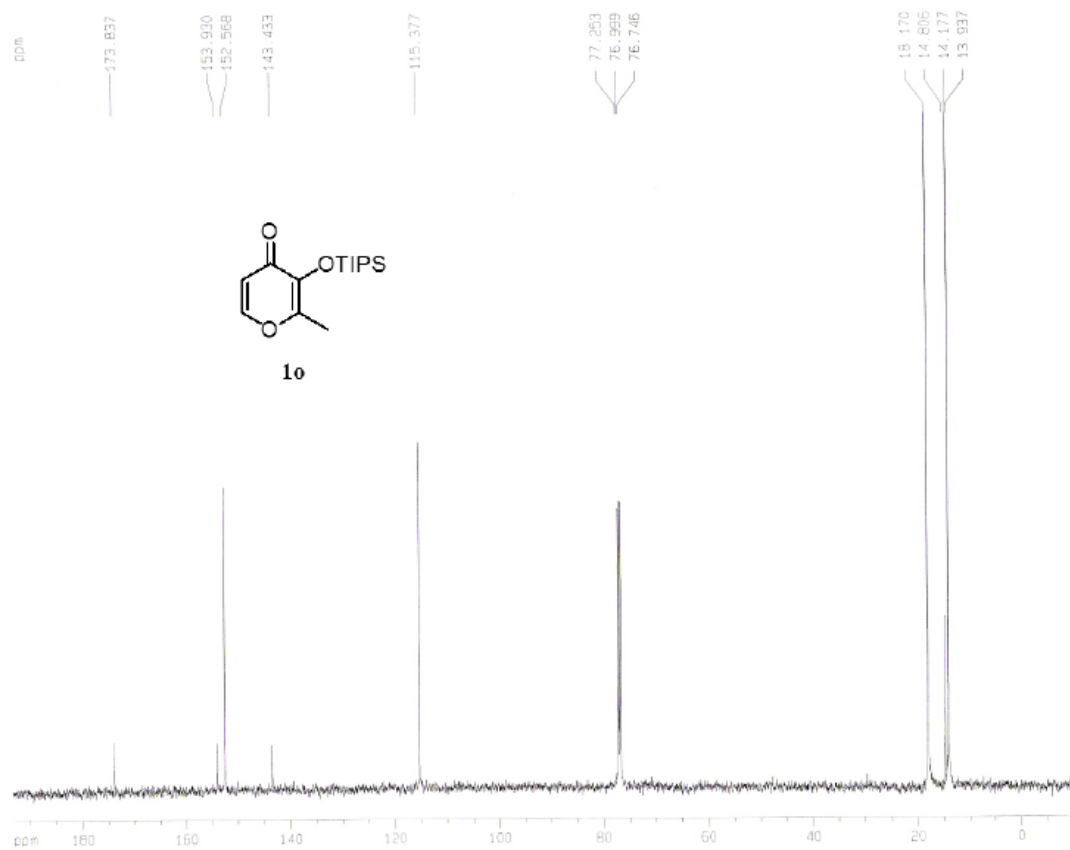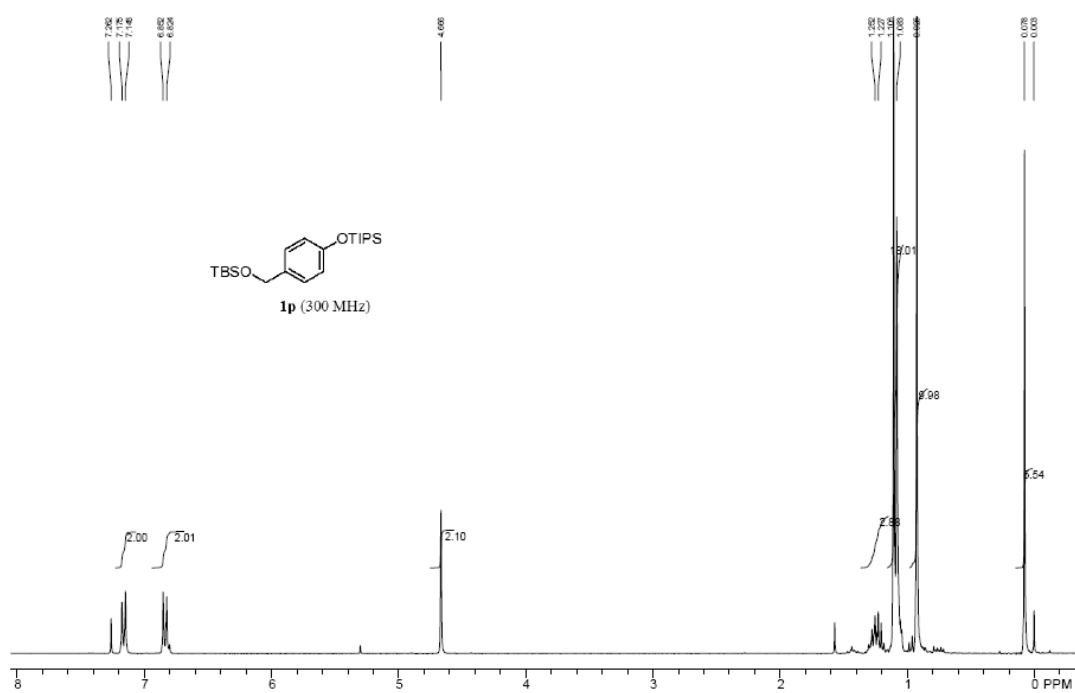

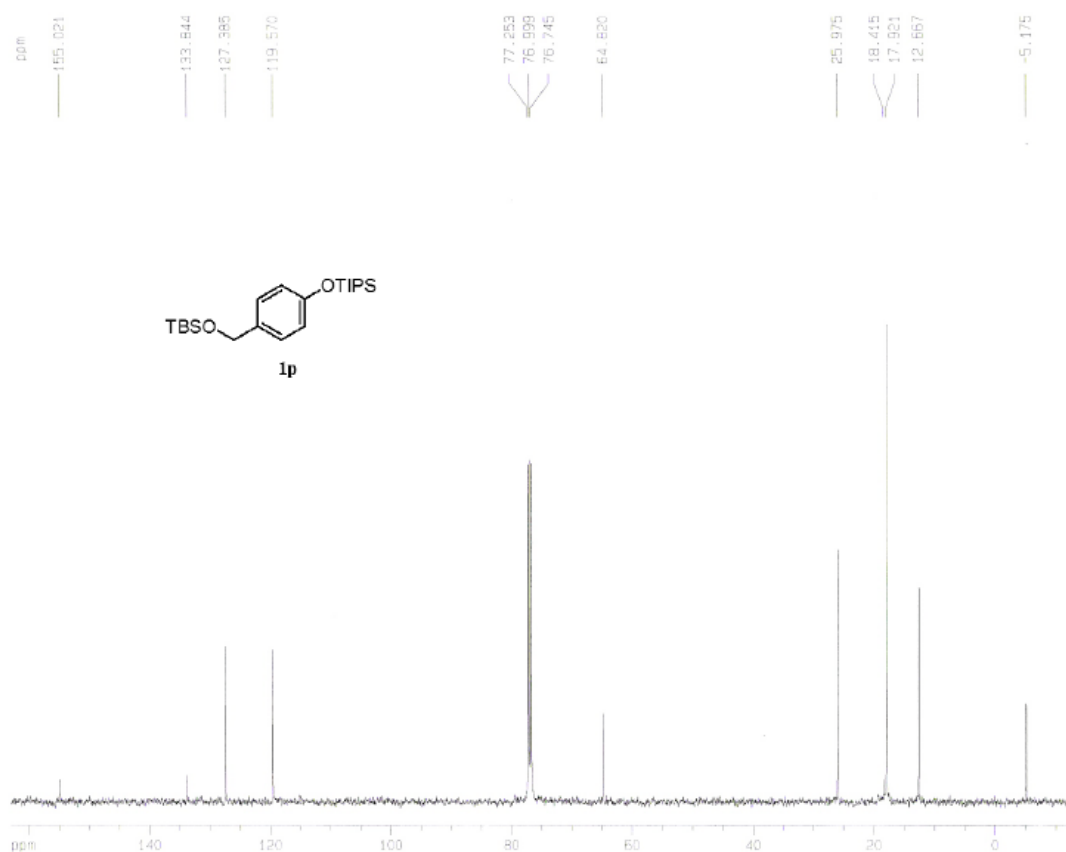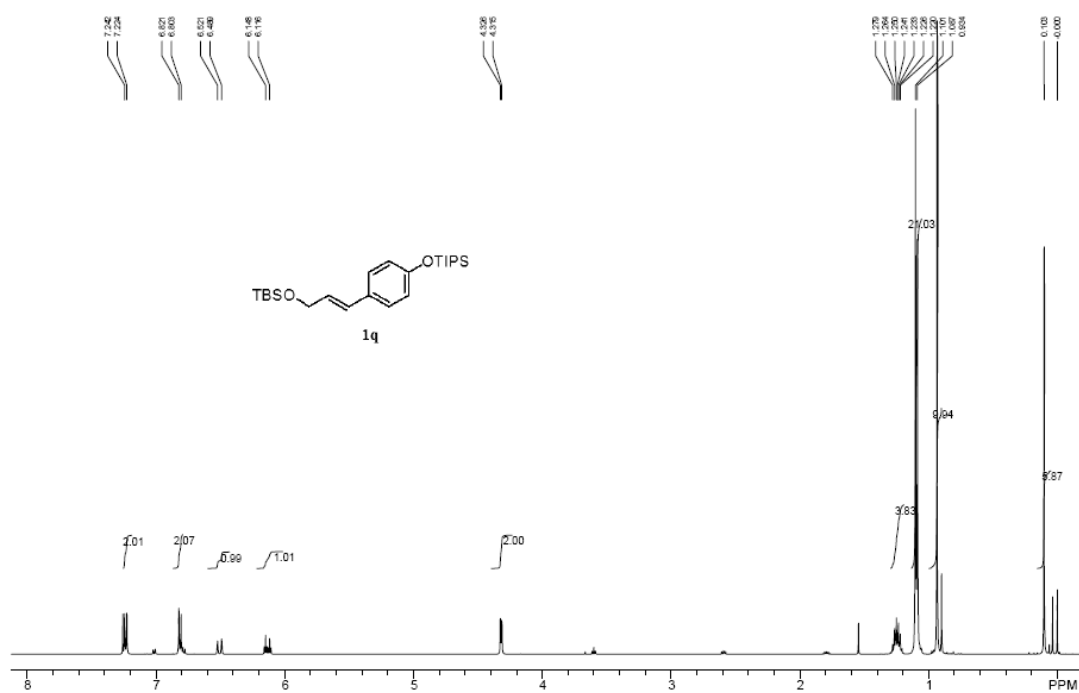

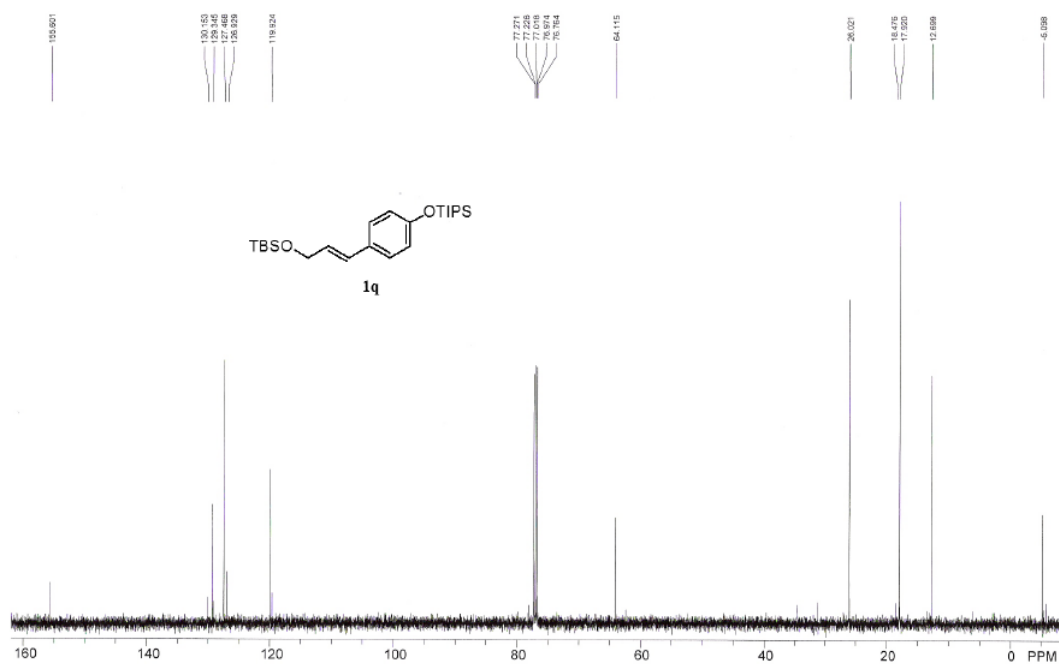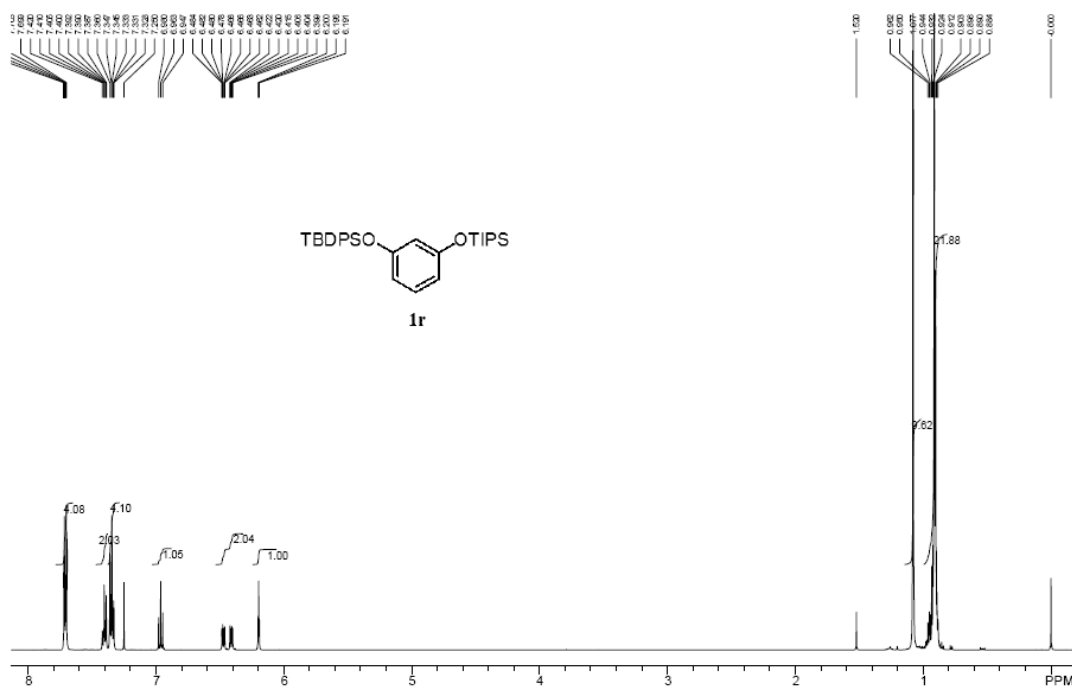

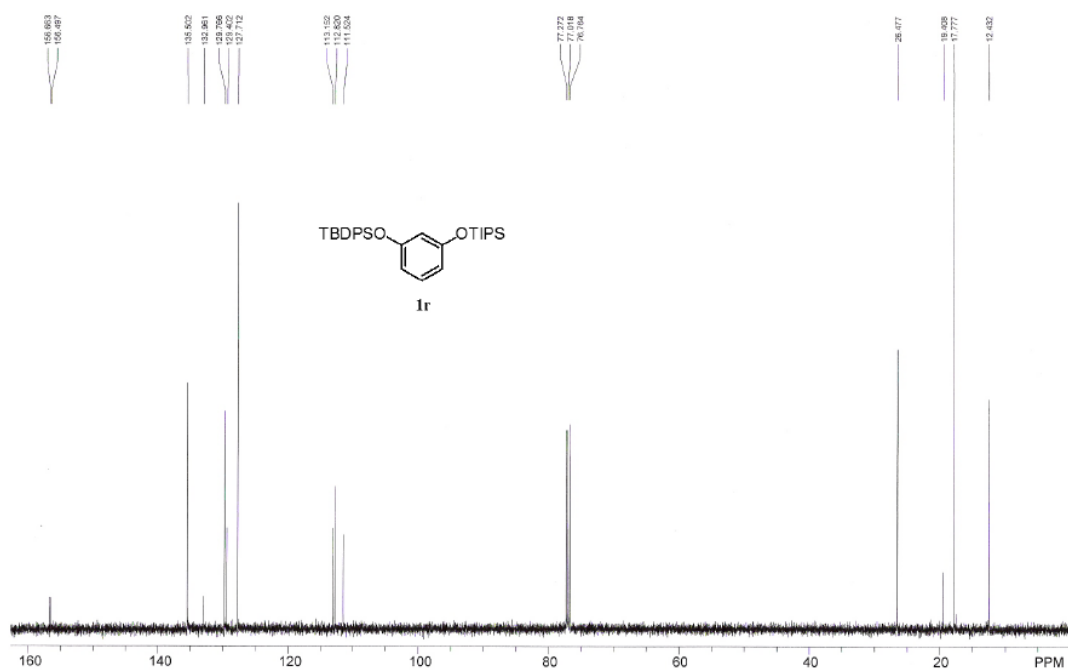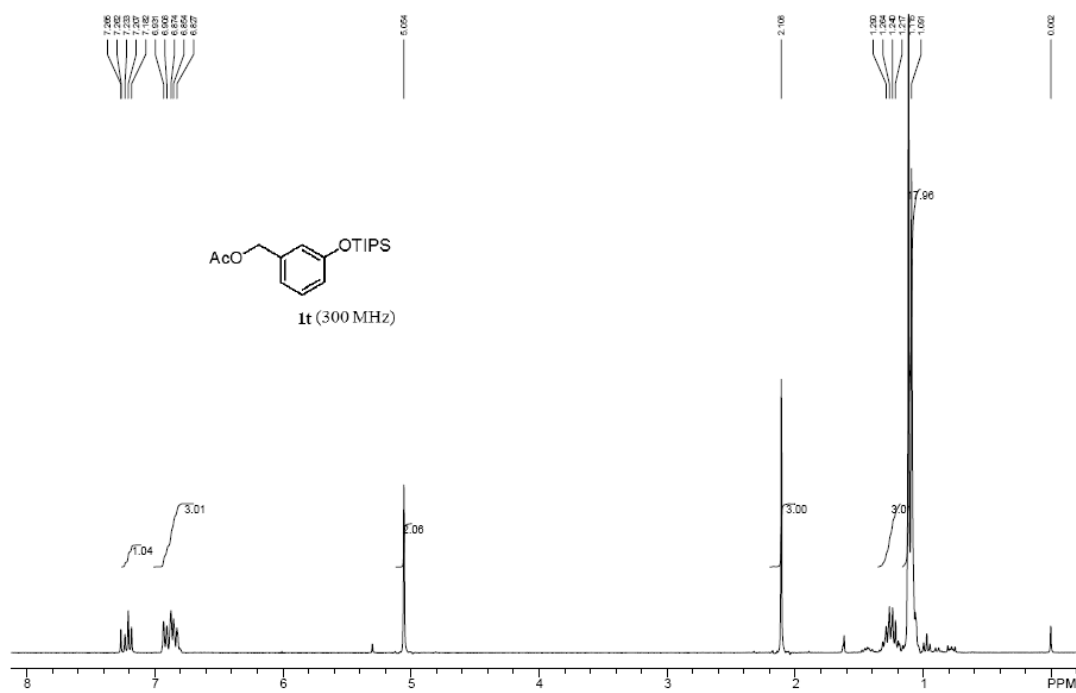



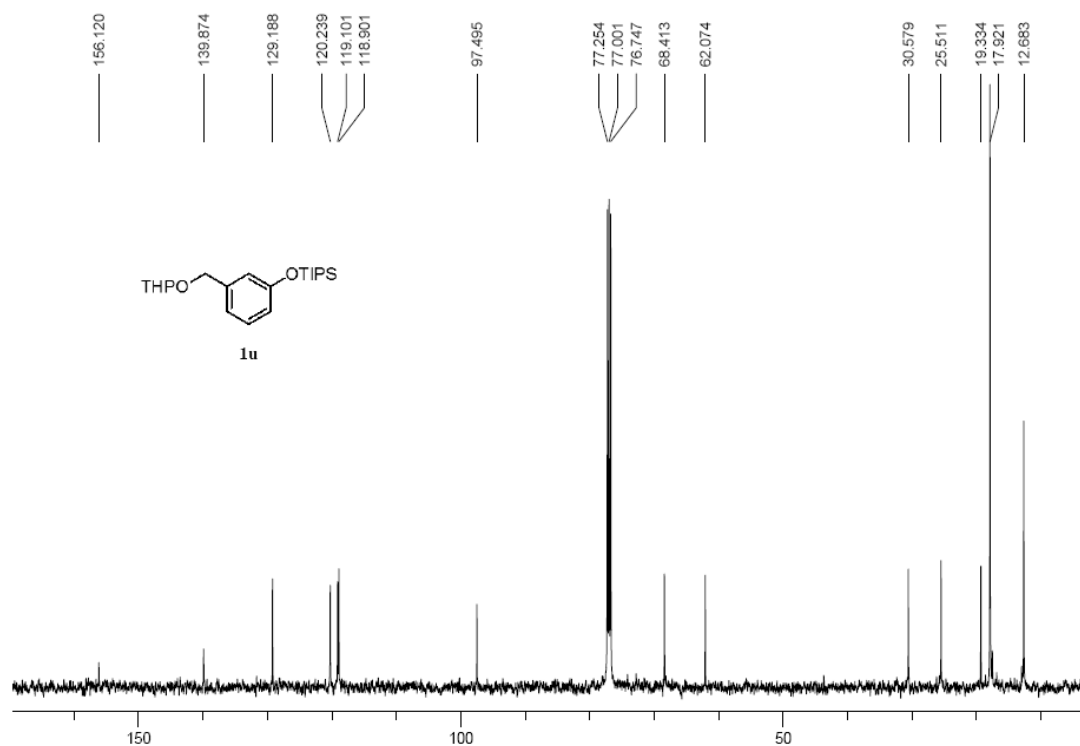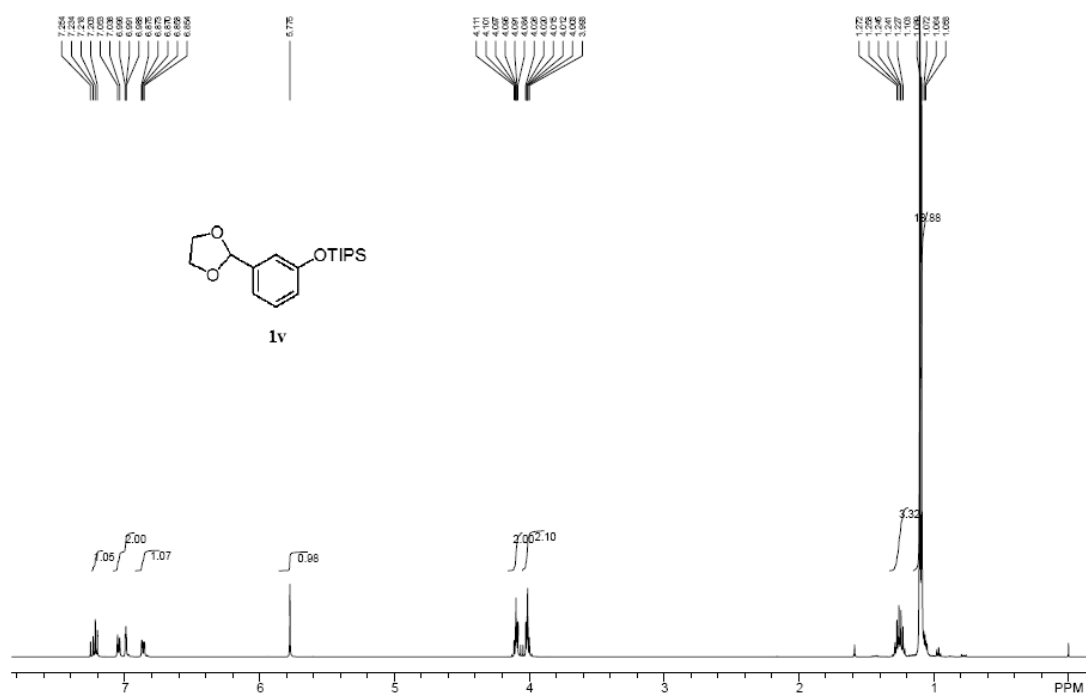

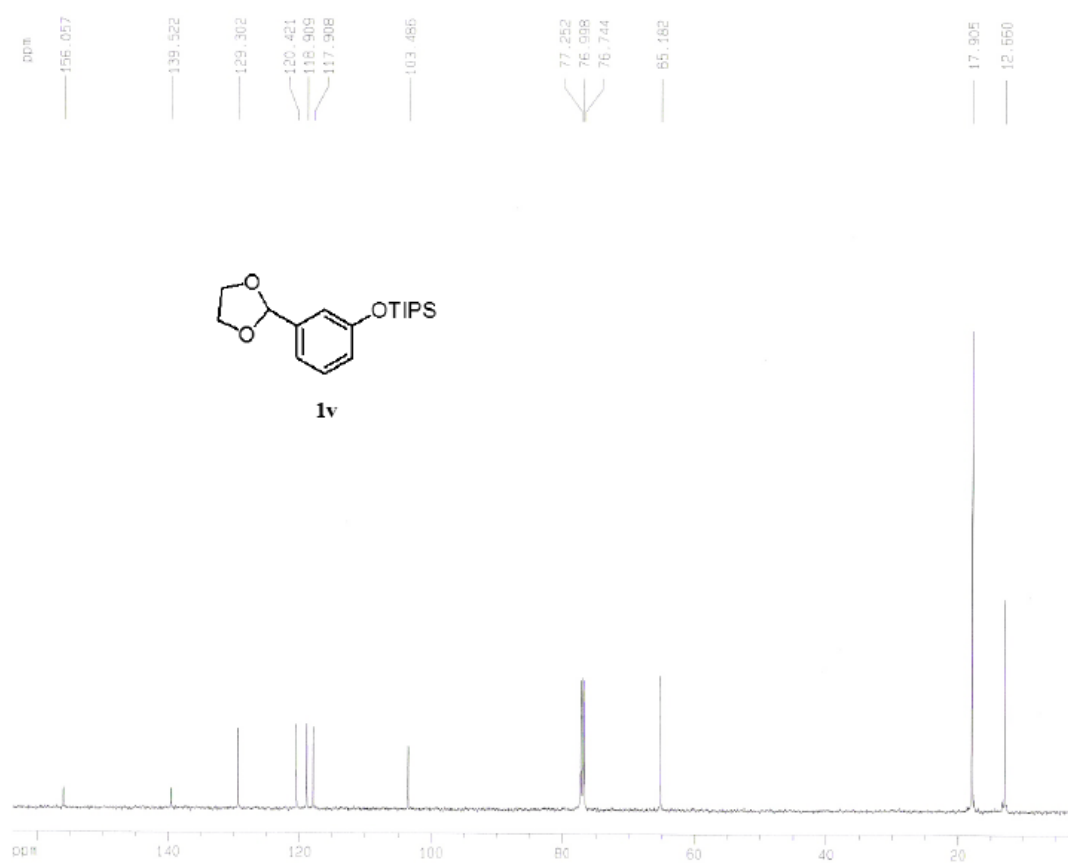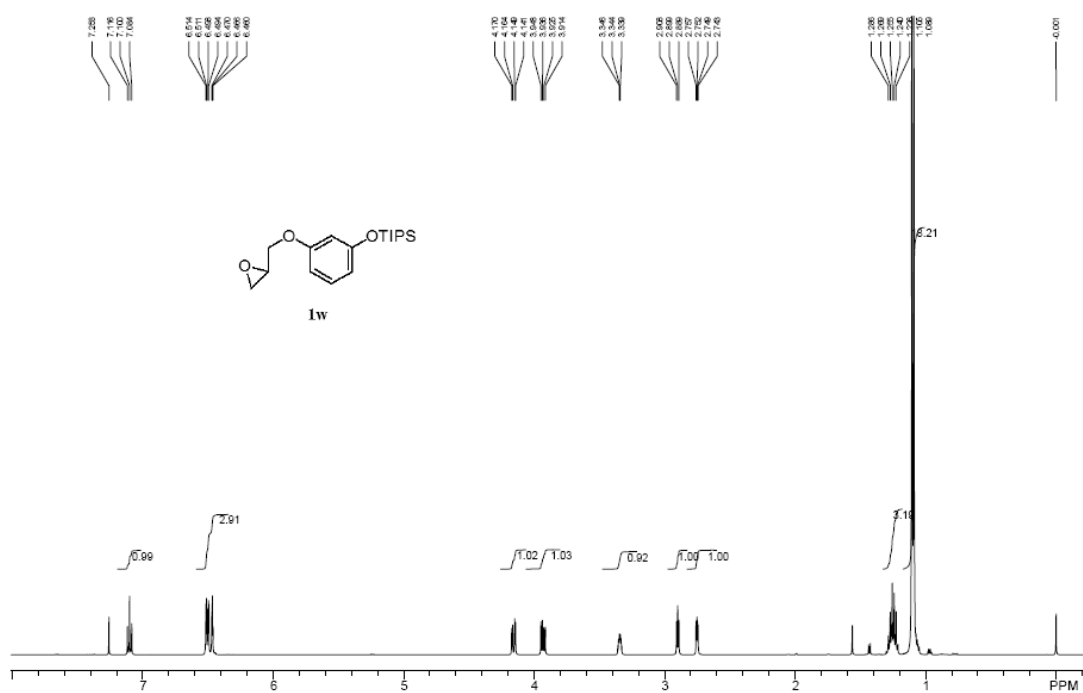





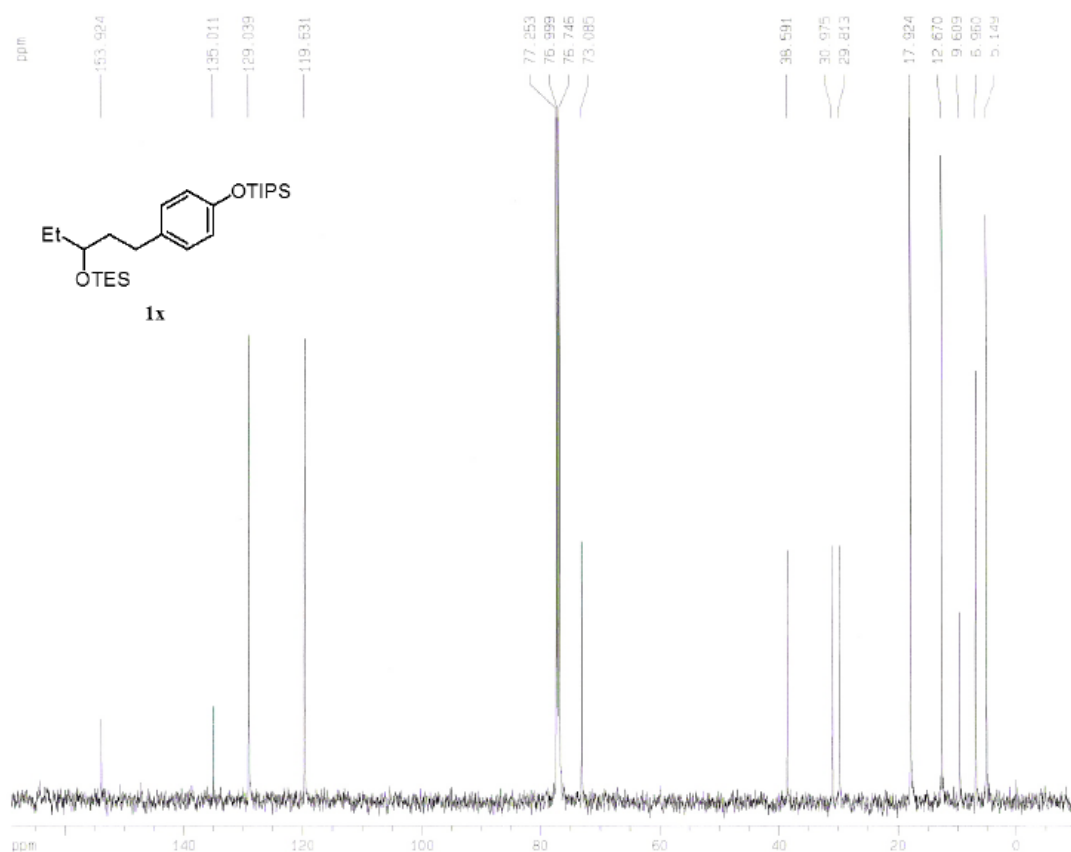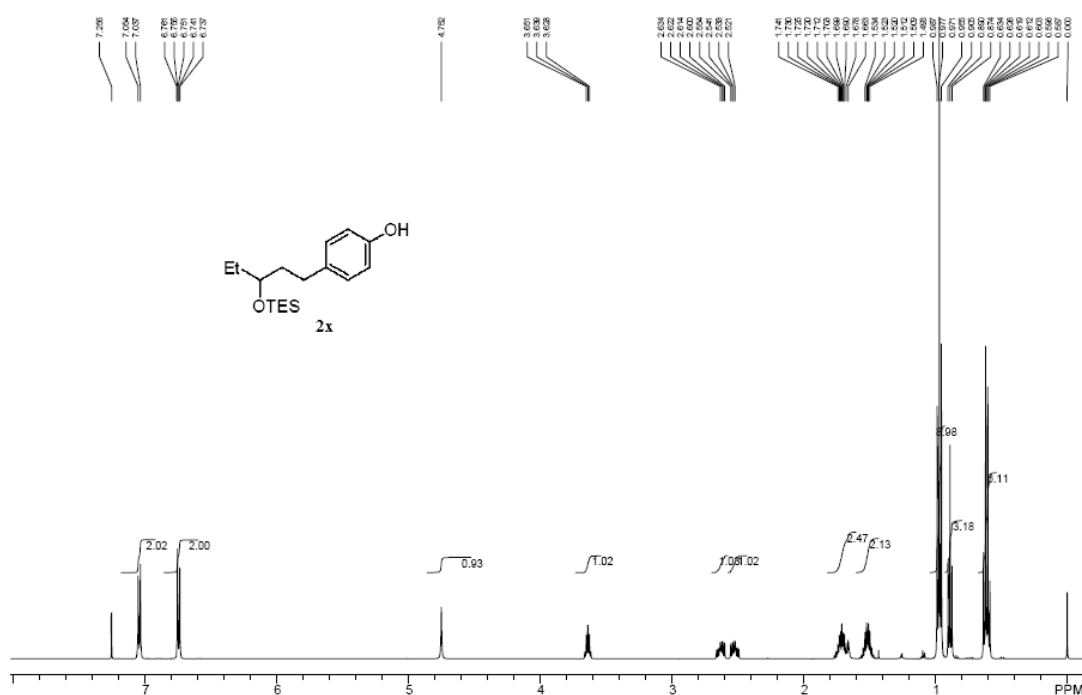

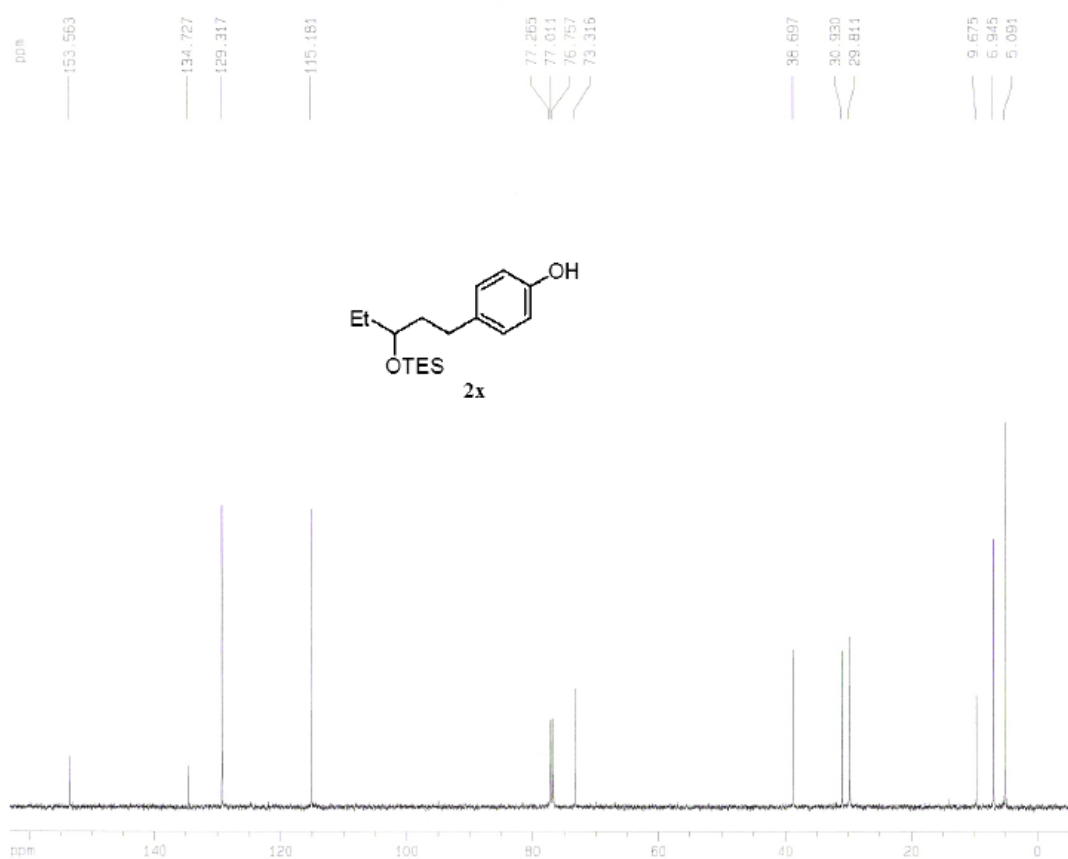

Supplement: b905443j.pdf [file b905443j.pdf]
